# Supplementary material
Source: publisher site journal article supplement (https://www.spandidos-publications.com/8153/downloadSupplementary)
Supplement: Supplementary file 1 [file downloadSupplementary]

**Table SI.** Sequences of the primers used for PCR.

| <b>Primer name</b> | <b>Sequence (5'-3')</b> | <b>Fragment length, bp</b> |
|--------------------|-------------------------|----------------------------|
| HPV-1 F            | TGGAGGTGGAACAATGTTGC    | 121                        |
| HPV-1 R            | AGTCAGGACGATCCACACAG    |                            |
| HPV2-F             | CGAGCTGTGCTACAGGTTGA    | 136                        |
| HPV2-R             | ATCTGGTTGCTGTGGTGTCT    |                            |
| HPV4-F             | GGCTTTGCTGTGTGGTTAGA    | 105                        |
| HPV4-R             | CAGAGGTTGCCTACAGGACA    |                            |
| HPV27-F            | GTGACTTGGAGGCTGTGTGT    | 130                        |
| HPV27-R            | AAGCTGTGGGAAAGAGCAAG    |                            |
| HPV57-F            | TCAGGTGCTGGTGGAAATGTA   | 115                        |
| HPV57-R            | TCAATGGTGGTCTGTGTTCC    |                            |

HPV, human papillomavirus; F, forward; R, reverse.

**Table SII.** PCR amplification process

| <b>Reaction agent</b>                                                                     | <b>Volume, <math>\mu</math>l</b> |
|-------------------------------------------------------------------------------------------|----------------------------------|
| 2x Universal blue SYBR green qPCR master mix (ABclonal Technology)                        | 7.5                              |
| 1.5 $\mu$ l primer mix (forward/reverse, each 2.5 $\mu$ M; final 0.25 $\mu$ M per primer) | 1.5                              |
| Sample                                                                                    | 2.0                              |
| Water nuclease-free                                                                       | 4.0                              |

**Table SIII.** PCR thermocycling conditions.

| <b>Stage</b> | <b>Step</b>         | <b>Temperature + time</b> | <b>Details</b>                                                               |
|--------------|---------------------|---------------------------|------------------------------------------------------------------------------|
| Stage 1      | Predenaturation     | 95°C, 30 sec              | -                                                                            |
| Stage 2      | Denaturation        | 95°C, 15 sec              | -                                                                            |
| Stage 2      | Annealing/extension | 60°C, 30 sec              | -                                                                            |
| Stage 3      | Melting curve       | 65°C→95°C                 | Collect the fluorescence signal once for every 0.5°C increase in temperature |
